# Supplementary material
Source: publisher figshare collection journal article supplement (https://acs.figshare.com/ndownloader/files/4464997)
Supplement: Supplementary file 1 [file 4464997]

# Synthesis and Thermo- / pH- Dual Responsive Properties of Poly(amidoamine) Dendronized Poly(2-hydroxyethyl) Methacrylate

By

Min Gao,<sup>†</sup> Xinru Jia,<sup>\*,†</sup> Yan Li,<sup>†</sup> Dehai Liang,<sup>†</sup> and Yen Wei<sup>§</sup>

Fax: (+86) 10 62751708

E-mail: [xrjia@pku.edu.cn](mailto:xrjia@pku.edu.cn)

## *-Table of Contents-*

|                                                                                                                              |       |
|------------------------------------------------------------------------------------------------------------------------------|-------|
| 1. <sup>1</sup> H NMR spectrum of <b>1</b> .                                                                                 | ...p2 |
| 2. GPC traces for <b>PGn-macro</b> ( $n = 1, 2$ ).                                                                           | ...p2 |
| 3. The plots of transmittance vs. temperature for <b>PG2-macro</b> solution (pH = 7.4) during one heating and cooling cycle. | ...p3 |
| 4. A series of optical micrographs of <b>PG2-macro</b> solution in the process of cooling.                                   | ...p3 |
| 5. The ESI MS spectra of <b>G1-macro</b> and <b>G2-macro</b> .                                                               | ...p4 |

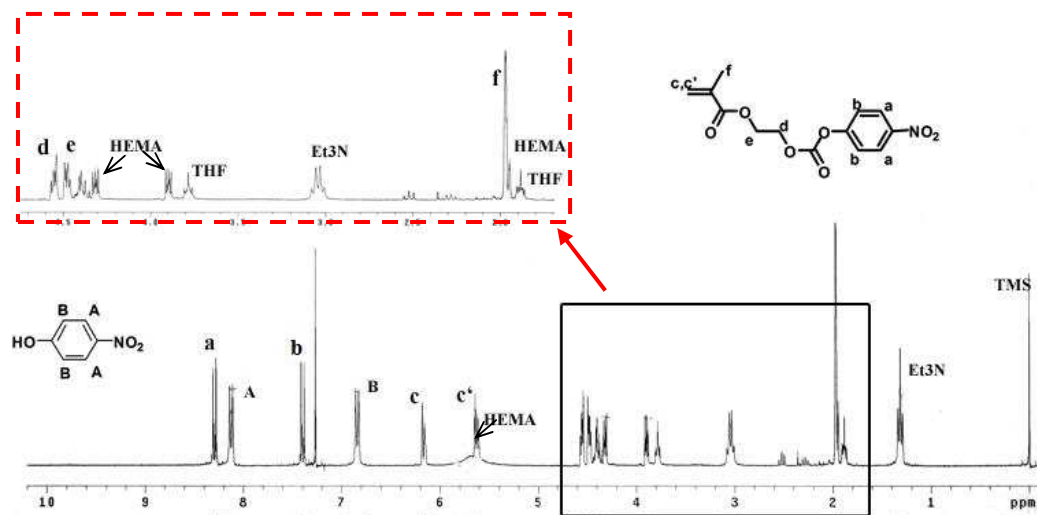

**Figure S1.**  $^1\text{H}$  NMR spectrum of 2-((4-nitrophenoxy)carbonyloxy)ethyl methacrylate (**1**, unpurified) in  $\text{CDCl}_3$  with TMS as internal standard at 300 MHz.

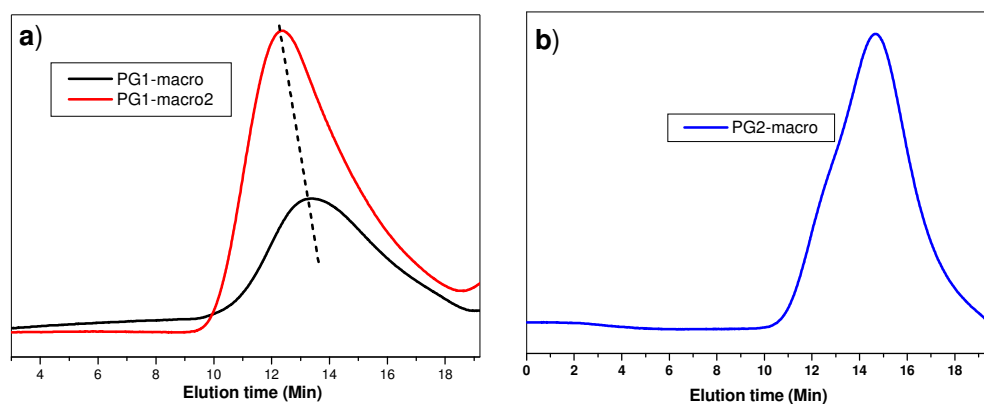

**Figure S2.** GPC traces for (a) **PG1-macro** (black line) and **PG1-macro2** (red line), and (b) **PG2-macro** with DMF containing 0.05 wt% LiBr as the eluent.

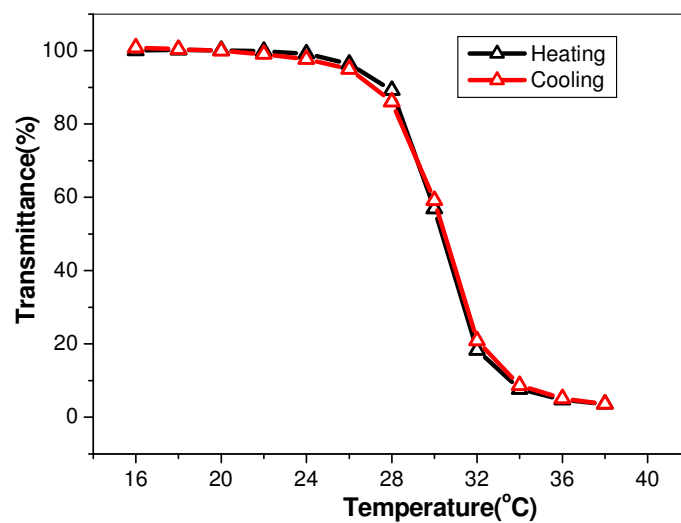

**Figure S3.** The plots of transmittance vs. temperature for **PG2-macro** solution (pH = 7.4) during one heating and cooling cycle.

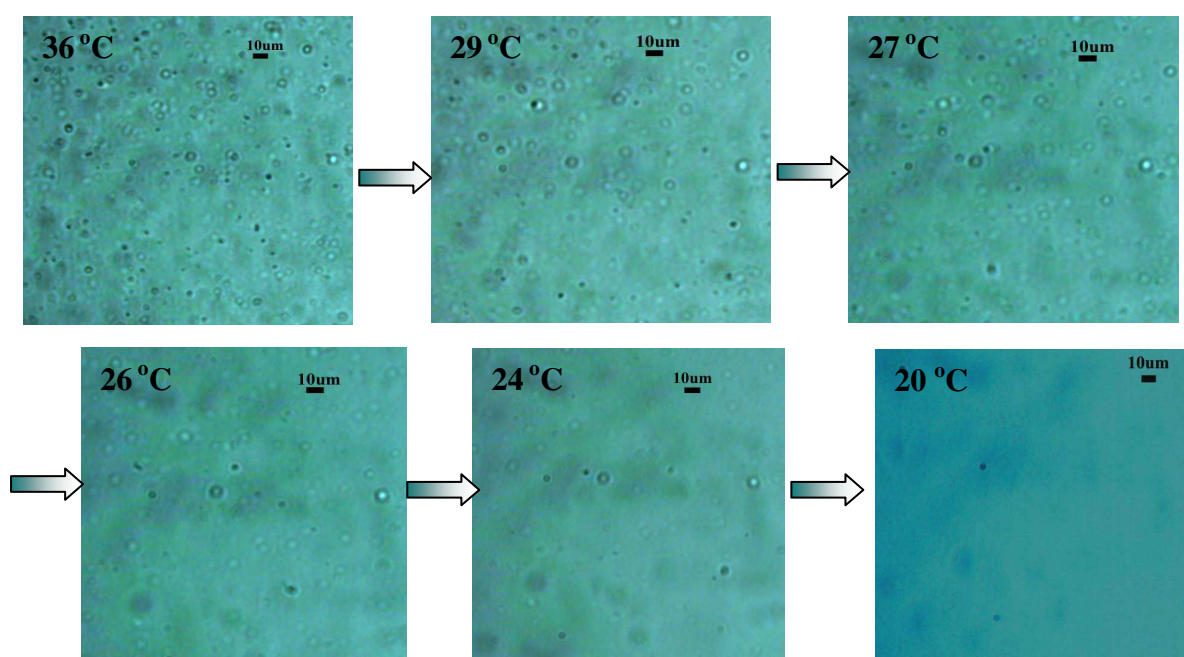

**Figure S4.** A series of optical micrographs of **PG2-macro** solution (pH = 7.4) in the process of cooling (from 36 to 20 °C) at the rate of 2 °C/min. The concentration of the solution is 1.0 mg mL<sup>-1</sup>.

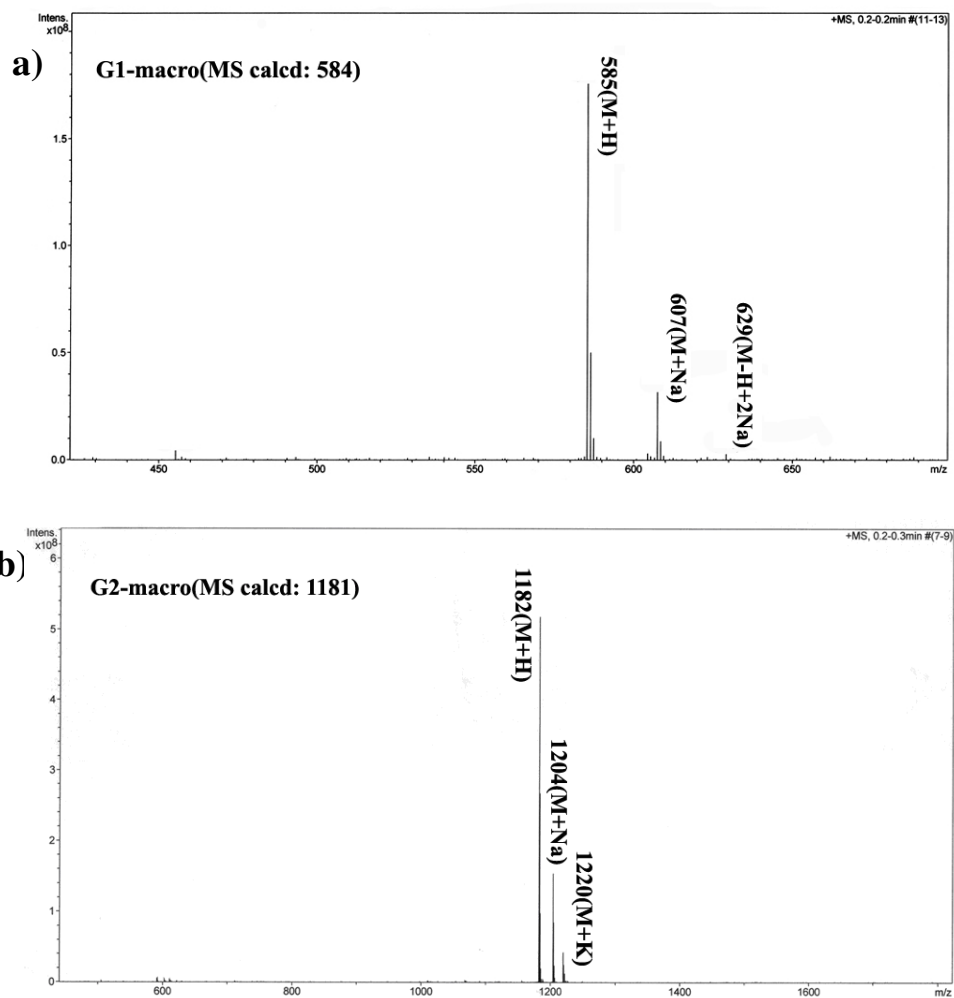

**Figure S5.** The ESI MS spectra of (a) **G1-macro** and (b) **G2-macro**.
